# Supplementary material
Source: PubMed Central journal article supplement (PMC3410225)

## Supplemental Information for

### Molecular Mechanisms of Prolactin and its Receptor

Charles L. Brooks  
Departments of Veterinary Biosciences and Biochemistry  
The Ohio State University  
Columbus, OH 43210

#### Supplemental Figure 1.

Amino Acid Sequence Alignment of Mature Mammalian Prolactins and Human Lactogenic Hormones. A: Sequence comparison of prolactins from various mammalian species: hPRL (human) P01236, prPRL (maquac) P055151, oPRL (ovine) P01240, bPRL (bovine) P01239, rbPRL (rabbit) Q28632, pPRL (porcine) P01238, rPRL (rat) P01237, and mPRL (mouse) P06879. B: Sequence comparison of human lactogenic hormones: hPRL (P01236), hGH (P01241), and hPL (P01243). Alignment was performed by the Clustal W (167) multiple alignment program in the UniProt suite (168).

#### Supplemental Figure 2.

Topology Diagram for Human Prolactin.

#### Supplemental Figure 3.

Amino Acid Sequence Comparisons of Mammalian Receptors. A. Sequence Comparisons of Mammalian Prolactin Receptors: hPRLr (human); P16471, oPRLr (ovine); O46561, bPRLr (bovine); Q28172, rbPRLr (rabbit); P14787, pPRLr (porcine); Q6JTA8, rPRLr (rat); P05710, mPRLr (mouse); Q08501 sequences. Numbering is for hPRL receptor. B. Sequence comparisons of the hPRL, hGH, and hEPO receptors. hPRLr; P16471, hGHr; P10912, and hEPOr; P19235. TM domains are underlined. Alignment was performed by the Clustal W (167) multiple alignment program in the UniProt suite (168).

#### Supplemental Figure 4.

Topology Diagram for the Extracellular Domain of the Human Prolactin Receptor .

Supplemental Figure 1A.

|       |                                                       |     |
|-------|-------------------------------------------------------|-----|
|       | 1                                                     | 50  |
| hPRL  | LPICPGGAARCQVTLRDLFDRAVVL SHYIHNLSSEMFSEFDKRYTHGRGF   |     |
| prPRL | LPICPGGAARCQVTLRDLFDRAVVL SHYIHNLSSEMFSEFDKRYTHGRGF   |     |
| oPRL  | TPVCPNGPGNCQVSLRDLFDRAVMVSHYIHNLSSEMFNEFDKRYAQGKGF    |     |
| bPRL  | TPVCPNGPGNCQVSLRDLFDRAVMVSHYIHDLSSEMFNEFDKRYAQGKGF    |     |
| rbPRL | LPICPSGAVNCQVSLRDLFDRAVILSHHIHKL SSEMFNEFDKRYTQGRGF   |     |
| pPRL  | LPICPSGAVNCQVSLRDLFDRAVILSHYIHNLSSEMFNEFDKRYAQGRGF    |     |
| rPRL  | LPVCSGG - -DCQTPLPELFDQVVMVLSHYIHTLYTDMFIEFDKQYVQDREF |     |
| mPRL  | LPICSAG - -DCQTSLRELFDQVVILSHYIHTLYTDMFIEFDKQYVQDREF  |     |
|       | 1                                                     | 48  |
|       | 51                                                    | 100 |
| hPRL  | ITKAINSCHTSSLATPEDKEQAQQMNQKDFLSLIVSILRSWNEPLYHLVT    |     |
| prPRL | ITRAINSCHTSSLPTPEDKEQAQQMNQKDFLSLIVSILRSWNEPLYHLVT    |     |
| oPRL  | ITMALNSCHTSSLPTPEDKEQAQQTHHEVLMSLILGLLRSWNDPLYHLVT    |     |
| bPRL  | ITMALNSCHTSSLPTPEDKEQAQQTHHEVLMSLILGLLRSWNDPLYHLVT    |     |
| rbPRL | ITKAINSCHTSSLSTPEDKEQAQQIHHEDLLNMVLRVLP SWNDPLYHLVT   |     |
| pPRL  | ITKAINSCHTSSLSTPEDKEQAQQIHHVLLNLILRVLR SWNDPLYHLVT    |     |
| rPRL  | IAKAINDCPTSSLATPEDKEQAQKVPPEVLLNLILSLVH SWNDPLFQLIT   |     |
| mPRL  | MVKVINDCPTSSLATPEDKEQALKVPPEVLLNLILSLVQSSSDPLFQLIT    |     |
|       | 49                                                    | 98  |
|       | 101                                                   | 150 |
| hPRL  | EVRGMQEAPDAILSKAVEIEEQTKRLL EGMELIVSQVHPETKENEIYPVW   |     |
| prPRL | EVRGMEEAPDAILSKAVEIEEQTKRLL EGMELIVSQVHPETKENEIYPVW   |     |
| oPRL  | EVRGMKGVPDAILSRATIEIEEENKRLLEGMEMIFGQVIPGAKETEPYPVW   |     |
| bPRL  | EVRGMKGAPDAILSRATIEIEEENKRLLEGMEMIFGQVIPGAKETEPYPVW   |     |
| rbPRL | EVRGMQEAPDAILSKATIEIEEQNRRLLEGM EKIVGQVHPGIKENEIYSVW  |     |
| pPRL  | EVRGMQEAPDAILSRATIEIEEQNKRLLEGM EKIVGQVHPGIKENEVYSVW  |     |
| rPRL  | GLGGIHEAPDAIISRATIEIEEQNKRLLEGI EKISQAYPEAKGNEIYLVW   |     |
| mPRL  | GVGGIQEAPDAILSRATIEIEEQNKQLLEGVEKIISQAYPEAKGNGIYFVW   |     |
|       | 99                                                    | 148 |
|       | 151                                                   | 199 |
| hPRL  | SGLPSLQMADEESRLSAYYNLLHCLRRDSHKIDNYLKLLKCR IHNNC      |     |
| prPRL | TGLPSLQMADEESRLSAYYNLLHCLRRDSHKIDNYLKLLKCR IHNNC      |     |
| oPRL  | SGLPSLQTKDEDARHS AFYNLLHCLRRDSSKIDTYLKLLNCR IYNNC     |     |
| bPRL  | SGLPSLQTKDEDARYS AFYNLLHCLRRDSSKIDTYLKLLNCR IYNNC     |     |
| rbPRL | SGLPSLQMADEDARLFAFYNLLHCLRRDSHKIDNYLKLLKCR IYDSNC     |     |
| pPRL  | SGLPSLQMADEDTRLFAFYNLLHCLRRDSHKIDNYLKLLKCR IYDSNC     |     |
| rPRL  | SGLPSLQGVDEESKDLAFYNNIRCLRRDSHKVDNYLKFLRCQIVHKNNC     |     |
| mPRL  | SGLPSLQGVDEESKILSLRNTIRCLRRDSHKVDNFLKVLRCQIAHQNNC     |     |
|       | 149                                                   | 197 |

Supplemental Figure 1B.

|      |                                                         |  |     |
|------|---------------------------------------------------------|--|-----|
|      | 1                                                       |  | 49  |
| hPRL | LPICPGGAARCQVTLRDLFDRAVVLSHYIHNLSSEMFSEFDKRYTHGRG-      |  |     |
| hGH  | -----FPTIPLSRLFDNAMLRAHRLHQLAFDTYQEFEEAYIPKEQK          |  |     |
| hPL  | -----VQTVPLSRLFDHAMLQAHRAHQLAIDTYQEFEEETYIPKDQK         |  |     |
|      | 1                                                       |  | 41  |
|      | 50                                                      |  | 96  |
| hPRL | ---FITKAINSCHTSSLATPEDKEQAQOMNQKDFLSLIVSILRSWNEPLY      |  |     |
| hGH  | YSFLQNPQTSLCFSESIPTPSNREETQOKSNLELLRISLLLIQSWLEP--      |  |     |
| hPL  | YSFLHDSQTSFCFSDSIPTPSNMEETQOKSNLELLRISLLLIQSWLEP--      |  |     |
|      | 42                                                      |  | 89  |
|      | 97                                                      |  | 146 |
| hPRL | HLVTEVRGMQEAPAEILSKAVEIEEQTKRLL EGMELIVSQVHPETKENEI     |  |     |
| hGH  | --VQFLRSVFANSLVYGASDSNVYDLLKDLE EGIQTLMGRL EDGSPRTGQ    |  |     |
| hPL  | --VRFLRSMFANNLVYDTSDDYHLLKDLE EGIQTLMGRL EDGSRRTGQ      |  |     |
|      | 90                                                      |  | 137 |
|      | 147                                                     |  | 199 |
| hPRL | YPVWSGLPSLQMADEESRLSAYYNLLHCLRRDSHKIDNYL KLLKCRIIHNNNC- |  |     |
| hGH  | IFKQTYSKFDTNSHNDDALLKNYGLLYCFRKDMDKVETFLRIVQCRSVEGSCGF  |  |     |
| hPL  | ILKQTYSKFDTNSHNHDALLKNYGLLYCFRKDMDKVETFLRMVQCRSVEGSCGF  |  |     |
|      | 138                                                     |  | 191 |

Topology Diagram for Human Prolactin

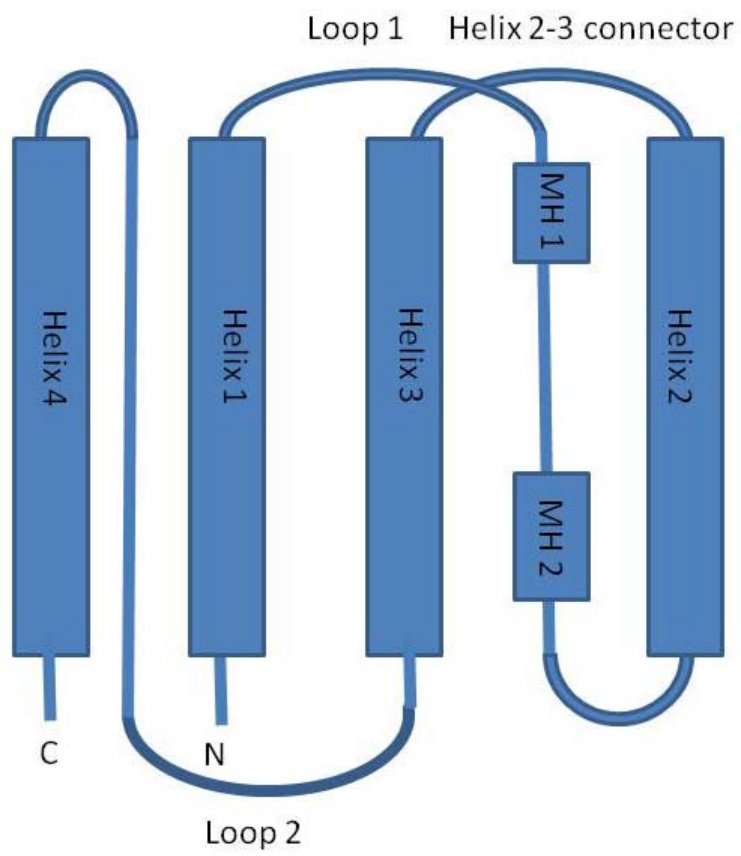

Supplemental Figure 3A.

|        |                                                         |     |
|--------|---------------------------------------------------------|-----|
|        | 1                                                       | 50  |
| hPRLr  | QLPPGKPEIFKCRSPNKETFTCWWRPGTDGGLPTNYSPTYHREGETLMHE      |     |
| oPRLr  | QSPPEKPKLIKCRSPGKETFTCWWEPEGADGGLPTNYTLTYRKEGETLIHE     |     |
| bPRLr  | QSPPEKPKLVKCRSPGKETFTCWWEPEGADGGLPTNYTLTYHKEGETLIHE     |     |
| rbPRLr | QSPPGKPFIFKCRSPEKETFTCWWRPGADGGLPTNYTLTYHKEGETITHE      |     |
| pPRLr  | QSPPGKPEIFKCRSPEKETFTCWKPGADGGLPTNYTLTYHKEGETFTHE       |     |
| rPRLr  | QSPPGKPEIHKCRSPDKETFTCWNPNGTDGGLPTNYSLTYSKEGEKTTYE      |     |
| mPRLr  | QSPPGKPEIHKCRSPDKETFTCWNPNGSDGGLPTNYSLTYSKEGEKNTYE      |     |
|        | 51                                                      | 100 |
| hPRLr  | CPDYITGGPN SCHFGKQYTS MWRTYIMMVNATNQMGSSFSDELYVDVTYI    |     |
| oPRLr  | CPDYKTGGPN SCYF SKKYTSIWKMYVITV SAINQMGISSSDPLYVDVTYI   |     |
| bPRLr  | CPDYKTGGPN SCYF SKKHTSIWKMYVITV NAINQMGISSSDPLYVHVTYI   |     |
| rbPRLr | CPDYKTGGPN SCYF SKKHTSIWTIYIITV NAINQMGISSSDPRYVDVTYI   |     |
| pPRLr  | CPDYKTGGPN SCYF NKKHTSIWTIYIITV NAINQMGISSSDPRYVDVTYI   |     |
| rPRLr  | CPDYKTS GPN SCFFSKQYTSIWKIYIITV NAINQMGISSSDPLYVDVTYI   |     |
| mPRLr  | CPDYKTS GPN SCFFSKQYTSIWKIYIITV NATNEMGSSTSDPLYVDVTYI   |     |
|        | 101                                                     | 150 |
| hPRLr  | VQDP PLELAVEVKQPEDRKP YLWIKWSPPTLIDLKTGWFTLLYEIRLKP     |     |
| oPRLr  | VEPEPPVNL TLELKH PEDRKP YLWIKWSPPTLTDVKSGWFSIQYEIRLKP   |     |
| bPRLr  | VEPEPPANL TLELKH PEDRKP YLWIKWSPPTMTDVKSGWFIIQYEIRLKP   |     |
| rbPRLr | VEPDPPVNL TLEVKH PEDRKP YLWVKWLPPTLVDVRSGLTLQYEIRLKP    |     |
| pPRLr  | VEPDPPVNL TLELKKPEDQKPYLWIKWLPPTLVDVRSGLTLQYEIRLQP      |     |
| rPRLr  | VEPEPPRNL TLEVKQLKDKKTYLWVKWSPPTITDVKTGWFTMEYEIRLKP     |     |
| mPRLr  | VEPEPPRNL TLEVKQLKDKKTYLWVKWLPPTITDVKTGWFTMEYEIRLKS     |     |
|        | 151                                                     | 200 |
| hPRLr  | EKAAEWEIHFAGQQTQFKILSLHPGQKYLQV RCKPDHGYWSAWSPATFI      |     |
| oPRLr  | EKATDWETHFAPKLTQLKIFNLYPGQKYLQV RCKPDHGYWSEWSPESFI      |     |
| bPRLr  | EKATDWETHFTLKQTQLKIFNLYPGQKYLQV RCKPDHGYWSEWSPESSI      |     |
| rbPRLr | EKAAEWEIHFAGQQTQFKILSLYPGQKYLQV RCKPDHGFWSVWSPESSI      |     |
| pPRLr  | EKTAEWEIHFAGQQTQFKILSLYPGQKYLQV RCKPDHGFWSWSPESSI       |     |
| rPRLr  | EEAEWEIHF TGHQTQFKVFDLYPGQKYLQV TRCKPDHGYWSRWSQESSV     |     |
| mPRLr  | EEAEWEIHF TGHQTQFKVFDLYPGQKYLQV TRCKPDHGYWSRWGQEKSI     |     |
|        | 201                                                     | 250 |
| hPRLr  | QIPSDFTMNDTTVWISVAVLSAVICLIIVVAVALKGYS MVTCIFPPVPGP     |     |
| oPRLr  | QIPNDFPVKDTSMWIFVGLSAVICLIMVVAVALKGYS MVTCILPPVPGP      |     |
| bPRLr  | QIPNDFPVKDTSMWIFVAILSAVICLIMVVAVALKGYS MVTCILPPVPGP     |     |
| rbPRLr | QIPNDFTMKDITVWIFVAVLSTIICLIMVVAVALKGYS MVTCIFPPVPGP     |     |
| pPRLr  | QIPNDFSMKDTTMMWIFVAILS AVVCLIMI VVAVALKGYS MVACILPPVPGP |     |
| rPRLr  | EMPNDFTLKDTT VWIIVAILS AVICLIMVVAVALKGYS MMTTCIFPPVPGP  |     |
| mPRLr  | EIPNDFTLKDTT VWIIVAVLSAVICLIMVVAVALKGYS MMTTCIFPPVPGP   |     |

251 300  
 hPRLr KIKGFD AHLLEK GKSE ELLSALGCQDFPPTS DYEDLLVEY LEVDDSE DQH  
 oPRLr KIKGFDIHLLEK GKSE ELLRALESQDFLPTS DCE DLLMEFIEVDDSE DQH  
 bPRLr KIKGFDVHLLEK GKSE ELLRALESQDFPPTS DCE DLLMEFIEVDDCE DQ  
 rbPRLr KIKGFDTHLLEK GKSE ELLSAFGCQDFPPTADCE DLLVEFLEVDDSE DQ  
 pPRLr KIKGFDTHLLEK GKSE ELLSALGCQDFPPTS DCE DLLVEFLEVDDSE DQ  
 rPRLr KIKGFDTHLLEK GKSE ELLSALGCQDFPPTS DCE DLLVEFLEVDDNE DER  
 mPRLr KIKGFDTHLLEK GKSE ELLSALGCQDFPPTS DCE DLLVEFLEVDDNE DER

301 350  
 hPRLr LMSVHSKEHPSQGMKPTYLDPD TDSGRGSCD SP SLLSEKCEEPQANPSTF  
 oPRLr LMPHPSKEHMEQGVKPMHLDPD TDSGRGSCD SP SLLSEKCEEPQAYPSKF  
 bPRLr LMPRPSKEHTEQGVKPMHLDLSDS GRGSCD SP SLLSEKCEEPQAHPSKF  
 rbPRLr LMPAHSKEHSGPGMKPTDLDPD NDSGRGSCD SP SLLSEKCEEPQANPSTF  
 pPRLr LMPAHSKEHPSQGRKPTHLPDSDS GRGSCD SP SLLSEKCEEP RANPPKF  
 rPRLr LMPSHSKEYPGQGVKPTHLPDSDS GHGSYDSH SLLSEKCEEPQAYPPTL  
 mPRLr LMPSHSKEYPGQGVKPTHLPDSDS GHGSYDSH SLLSEKCEEPQAYPPAF

351 397  
 hPRLr YDPEVIEK PENP--ETTHTWDPQCISMEGKIPYFHAGGSKCSTWPLQP-  
 oPRLr HIPEGPEKLEDPETNHTCLQAPQSTSGEGKIPYFLANGPKSSTWPFQPP  
 bPRLr HTPEGPEKLENPETNL TCLQAPQSTSV EGKIPYFLANGPKSSTWPFQPP  
 rbPRLr HTPEVIEQPEKPKANVTHTWDPQTISLVGKMPYLSVNGSKSSTWPLLQP-  
 pPRLr HTPEGIEKPGDPETNLPRPQDPQSTSVESKLLYFHADGSKSSTWPLQPP  
 rPRLr HIPEITEK PENPEANIPPTVDPQSTN-----PNFHVDAPKSSTWPLLPG-  
 mPRLr HIPEITEK PENPEANIPPTPNPQNNT-----PNCHTDTSKSTTWPLPPG-

398 447  
 hPRLr SQHNPRSSYHNI TDVCELAVGPAGAPATLLNEAGKDALKSSQTIKSREEG  
 oPRLr SLYSPRYSYHNIADVCELALGMAGTTATLLDQTDQHAFKPSKTIETGGEG  
 bPRLr SLYSPRYSYHNIADVCELALGMAGTTATSLDQTDQHALKASKTIETGREG  
 rbPRLr GQHNTNSPYHNIADMCKLATS-----LDKIDKDALQSSKTEAAGEE  
 pPRLr ILHDPGSSYHNLADVGQLVLGTAGATAALLEKTDRHAFNPPKTTETGGEG  
 rPRLr -QHMPRSPYHSVADVCKLAGSPVNTLDSFLDKAEENVLKL SKALETGEE-  
 mPRLr -QHTRRSPYHSIADVCKLAGSPGDTLDSFLDKAEENVLKL S--EDAGEE-

448 497  
 hPRLr KATQQREVESFHSETDQDTPWLLPQEKTPFGSAKPLDYVEIHKVNKD GAL  
 oPRLr KAAKQSESEGY SSEPDQDMAWPLLQDKTPLFS AKPLEYVEIHKVSQDGV L  
 bPRLr KATKQRESEGCSSKPDQDTVWPRPQDKTPLISAKPLEYVEIHKVSQDGV L  
 rbPRLr KATKQREVESSHSAEQDTGWLLPKEKPPFISP KPLDYVEIHKVNKD GAL  
 pPRLr RATEQKESESFHSKTDQGTWVLLPQDKGPFVSPKPM EYVEIHKVSKD GAL  
 rPRLr EVAEQKGAKSFP SD-KQNTPWPLLQEK SPTVYVKPPDYVEIHKVNKD GAL  
 mPRLr EVAVQEGAKSFP SD-KQNTSWPPLLQEK GPIVYAKPPDYVEIHKVNKD GAL

498 547

|        |                                                       |
|--------|-------------------------------------------------------|
| hPRLr  | SLLPKQRENSGKPKKPGTPENNKEYAKVSGVMDNNILVLPDPHAKNVAC     |
| oPRLr  | ALFPKQNE-----KVDAPETSKEYSKVSRVTDSNII LVLIPDLQAQNLT L  |
| bPRLr  | ALFPKQNE-----KFGAPEASKEYSKVSRVTDSNII LVLVPDPQAQNLT L  |
| rbPRLr | SLLLKQKENG DQTGKAGTPETSKEYAKVSRVMDNNII LVLVQDPGAQNVAL |
| pPRLr  | ALLPKQQENGDRPEKAGAPETSKEYAQVSRVMDNHI LVLVQDPRARNVAP   |
| rPRLr  | SLFPKQREN-NQTEKPGVPETSKEYAKVSGITDNNII LVLVPDSRAQNTAL  |
| mPRLr  | SLLPKQREN-HQTENPGVPETSKEYAKVSGVTDNNII LVLVPDSRAQNTAL  |

548

598

|        |                                                      |
|--------|------------------------------------------------------|
| hPRLr  | FEEAKEAPPSLEQNQAEKALANFTATSSKRLQLGGLDYLD PACFTHSFH   |
| oPRLr  | LEESAKKAPPALP-----                                   |
| bPRLr  | LEEPAKKAPPALP-----                                   |
| rbPRLr | FEESTKEAPPSPSQNQAEKDLSSFSTAPSDCRLQQGGLDYLD PACFMHSLH |
| pPRLr  | FEEPTKETPPSRPQNPAAKDLASFTTAPGHRHPLGGLDYLD PAGFMHSFQ  |
| rPRLr  | LEESAKKAPPSFEADQSEKDLASFTATSSNRRLQLGRLDYLDPTCFMHSFH  |
| mPRLr  | LEESAKKVPPSLEQNQSEKDLASFTATSSNCRLQLGRLDYLDPTCFMHSFH  |

Supplemental Figure 3B.

|           |                                                            |     |
|-----------|------------------------------------------------------------|-----|
| hPRLr 1   | -----QLPPG--KPEIFKCRSPNKETFTCWWR                           | 25  |
| hGHr 1    | SGSEATAAILSRAPWSLQSVNPLKTNSSKEPKFTKCRSPERETFSCHW           | 50  |
| hEPOr 1   | -----APPPNLPDPKFESKAALLAARGPEELLCFTERLEDLVCFWE             | 41  |
| hPRLr 26  | PGTDGGLPTN-----YSLTYHREGETLMHECPDYITGGPNSCHFGKQYT          | 69  |
| hGHr 51   | DEVHHGTKNLGPIQLFYTRRNTQEWQEWKECPDYVSAGENSCYFNSSFT          | 100 |
| hEPOr 42  | EAASAGVGPNG-YSFSYQLEDEPWKLCRLHQAPTARGAVRFWCSLPTADT         | 90  |
| hPRLr 70  | SMWRTYIMMVNATNQMGSSFSDELYVDVTYIVQDPDPLELAVEVK--QPE         | 117 |
| hGHr 101  | SIWIPYCIKLSN----GGTVDEKCFVDEIVQDPPIALNWTLLNVSLT            | 146 |
| hEPOr 91  | SSFVPLELRVTAAS---GAPRYHRVIHINEVLLDAPVGLVARLA-----          | 132 |
| hPRLr 119 | DRKPYLWIKWSPPTLIDLKTGWFTLLYEIRLKPEKAAEWEIHAFAGQQTEF        | 167 |
| hGHr 147  | GIHADIQVRWEAPRNADIQKGMVLEYLELQYKEVNETKWKMMDPILTTSV         | 196 |
| hEPOr 133 | DESGHVLRWLPPPETPMTS-HIRYEVDSAGNGAGSVQRVEILEGRTEC           | 182 |
| hPRLr 169 | KILSLHPGQKYLQVR---CKP-DHGYWSAWSPATFIQIP-- <u>SDFTMNDT</u>  | 211 |
| hGHr 197  | PVYSLKVDKEYEVRVR---SKQRNSGNYGEFSEVLYVTLPQMSQFTCEED         | 243 |
| hEPOr 185 | VLSNLRGRTRYTFAVRARMAEPSFGGFWSAWSEPVSLTLP-----SD            | 224 |
| hPRLr 213 | <u>T--VWISVAVLSAVICLIIVWAVALKG</u> -YSMVTCIFPPVPGPKIKGFDAH | 258 |
| hGHr 244  | <u>FYFPWLLIIIFGIFGLTVMFLFVFLFSKQRIKMLILPPVPVKIKGIDPD</u>   | 293 |
| hEPOr 225 | <u>LDPLILTLSLILVILVLLTVLALLSHRRALKQKIWPGIPSESEFEGLF</u>    | 274 |
| hPRLr 260 | LLEKKGSEELLSALGCQD-FPPTSDYEDLLVEYLEVDDSE-DQHLMVSHS         | 306 |
| hGHr 294  | LLKEGKLEEVNTILAIHDSYKPEFHSDDSWVEFIELDIDEPDEKTEESDT         | 344 |
| hEPOr 275 | TTHKGNFQLWLQNDGCLWWSPTPFTE-----                            | 301 |
| hPRLr 308 | KEHPSQGMKPTYLDP---DTDSGRGSCDSPSLLSEKCEE--PQANPSTFY         | 351 |
| hGHr 345  | DRLLSSDHEKSHSNLGVKDGDSGRTSCCEPDILETDFNANDIHEGTSEVA         | 394 |
| hEPOr 302 | -----DPPASLEVLSERCWGTMQAVEPGTDD                            | 328 |
| hPRLr 353 | DPEVIEKPENPETHTTWDQPCISMEGKIPYFHAG----GSKCSTWPLPQP         | 397 |
| hGHr 395  | QPQRLKGEADLLCLDQKNQNSPYHDACPATQQPSVIAEKNKPQPLPTE           | 444 |
| hEPOr 329 | EGPLLEPVGSEHAQDTY-----LVLDKWLLPRN-                         | 355 |
| hPRLr 400 | -SQHNPRSSYHNITDVCELAVGPAGAPATLLNEAGKDALKSSQTIKSREE         | 446 |
| hGHr 445  | GAESTHQAHIQLSNPSSLSNIDFYAQVSDITPAGSVVLSPGQKNKAGMS          | 494 |
| hEPOr 356 | ----PPSEDLPGGGSVDIVAMDEGSEASSCSSALASKPSP-----E             | 394 |
| hPRLr 450 | GKATQQREVESFHSETDQDTPWLLPQEKTPFGSAKPLDYVEIHKVNKDGA         | 496 |
| hGHr 495  | QCDMHPPEMVSLCQENFLMDNAYFCEADAKKCI PVAPHIKVESHIQPSLNQ       | 543 |
| hEPOr 395 | GASAASFYITLDPSSQLLRPWTLCPELP---PTPHLKYLYLVVSDSGIS          | 441 |



|       |     |                                                       |     |
|-------|-----|-------------------------------------------------------|-----|
| hPRLr | 500 | LSLLPKQRENSGKPKKPGTPENNKEYAKVSGVMDNNILVLPDPHAKNVA     | 546 |
| hGHr  | 544 | EDIYITTESLTAAAGRPGTGEH-----VPGSEMPVPD                 | 575 |
| hEPOr | 442 | STDYSSGDSQGAQGG-----                                  | 455 |
|       |     |                                                       |     |
| hPRLr | 550 | CFEESAKEAPPSLEQNQA EKALANFTATSSKRLQLGGLDYLD PACFTHSFH | 598 |
| hGHr  | 576 | YTSIHIVQSPQGLILNATALPLPDKEFLSSCGYVSTDQLNKIMP-----     | 619 |
| hEPOr | 458 | -LSDGPYSNPYENSLIPAAEPLPPSYVACS-----                   | 484 |

Topology Diagram for the Extracellular Domain of the Human Prolactin Receptor

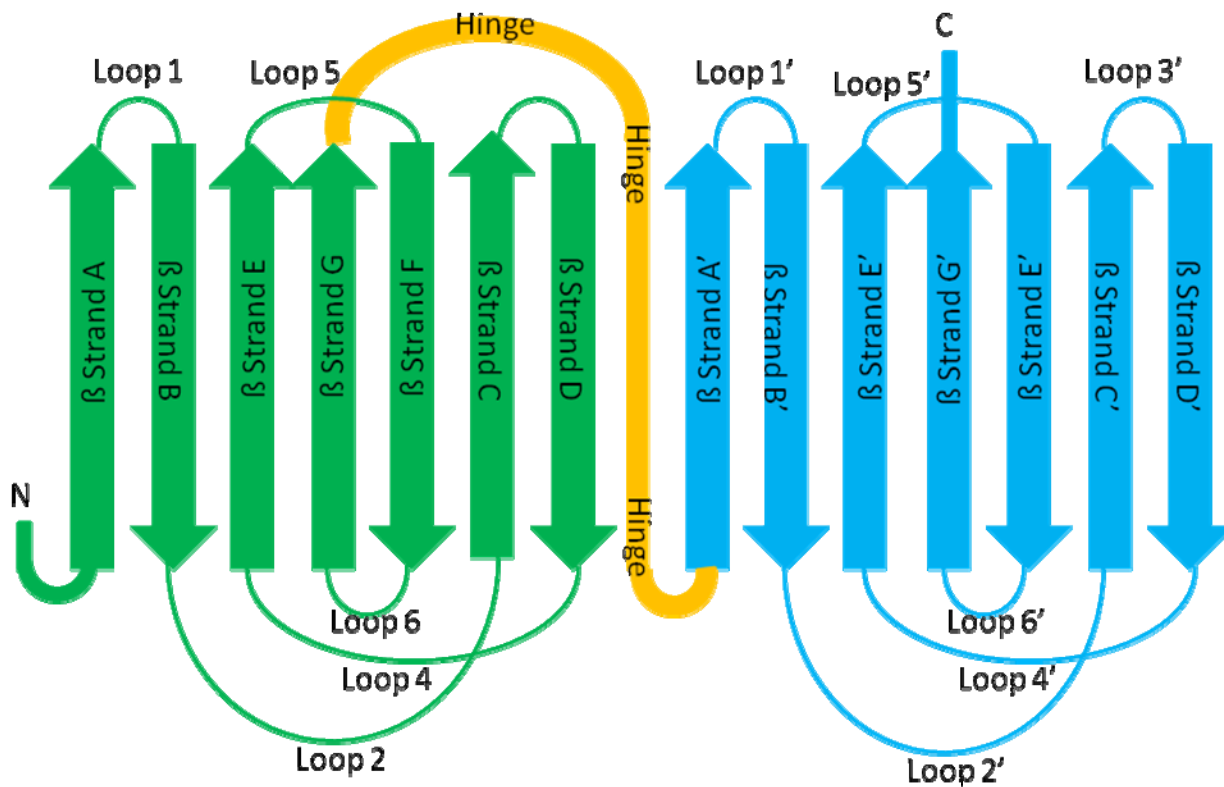

Supplement: supp_er.2011-1040_er-11-1040_F1_to_4.pdf [file supp_er.2011-1040_er-11-1040_F1_to_4.pdf]
